# Supplementary material
Source: Springer Nature journal article supplement (https://www.springermedizin.de/resource/supplementary/12967_2011_765_MOESM3_ESM.pdf/9577008)

**A)**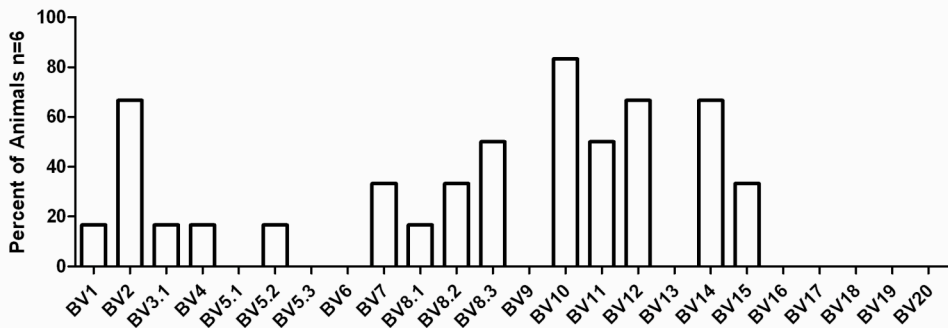**B)**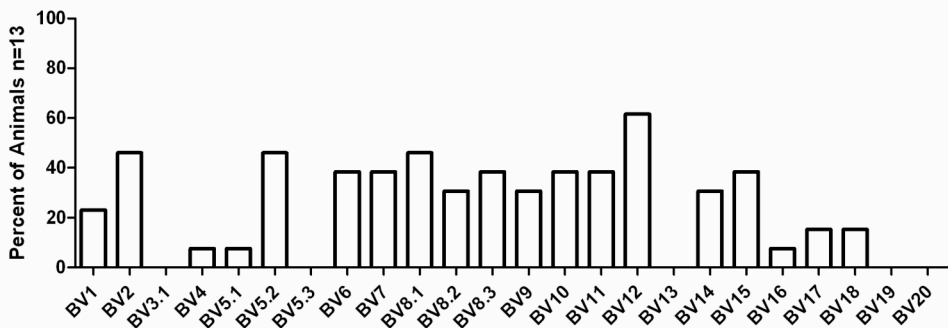**C)**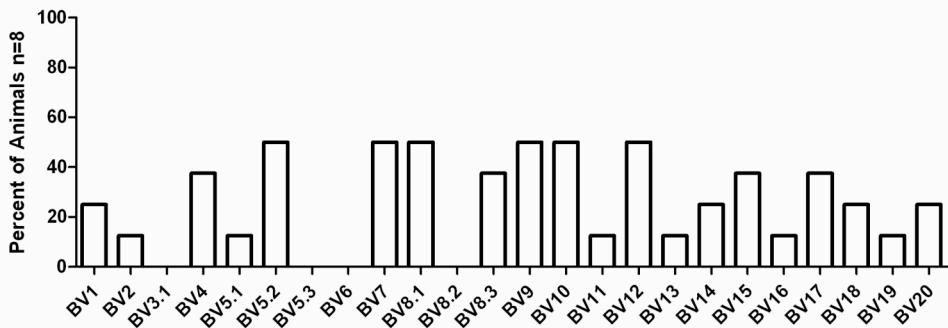

Supplement: MOESM3 [file 9577008]
